# Supplementary material for: Metagenomic Insights into the Carbohydrate-Active Enzymes Carried by the Microorganisms Adhering to Solid Digesta in the Rumen of Cows
Source: PLoS One. 2013 Nov 5;8(11):e78507. doi: 10.1371/journal.pone.0078507 (PMC3818352; doi:10.1371/journal.pone.0078507)
Supplement: Table S6 — The ORFs used in Figure 4 . * For Tammar Wallaby, reindeer and cow rumen, data were either downloaded from IMG database under each project or cited from paper [3], [5]. For Buffalo rumen fosmids, data were downloaded from Genbank (www.ncbi.nlm.nih.gov). For yak rumen, only four sequence information were available in Genbank at present and the rest information were cited from reference [7]. For this study, the Genbank accession numbers for the contigs were listed. † For tammar wallaby, buffalo rumen, reindeer and cow rumen, CAZy ID were adapted from the paper by Pope et al. [5]. For yak rumen, data were obtained from Genbank and the paper by Dai et al. [7]. # Sample ID (Acc. num.) were adapted from the paper by Pope et al. [5]. ‡ BACON, Bacteroidetes-Associated Carbohydrate-binding Often N-terminal. (XLSX) [file pone.0078507.s007.xlsx]

## Sheet: Sheet1
	Table S6. The ORFs used in Figure 4.
	Contig/Scaffold	Gene	Gene_ID*	Protein ID	Description	Length	CAZy ID†	Sample ID (Acc. num.) #	Other domains‡
	Tammar Wallaby foregut fosmid
			2021681102		cellobiose phosphorylase (EC 2.4.1.20)	805	GH94
			2021681103		Cellulase (glycosyl hydrolase family 5)	338	GH5
			2021681104		sugar (Glycoside-Pentoside-Hexuronide) transporter	451
			2021681105		Predicted glycosylase	384	GH43
			2021681106		Endoglucanase	536	GH5
			2021681107		Beta-mannanase	457	GH26
			2021681108		hypothetical protein	781
			2021681109		hypothetical protein	447
			2021681110		RagB, SusD and hypothetical proteins.	616
			2021681111		TonB-dependent Receptor Plug Domain./TonB dependent receptor	1072
			2021681112		Acetyl esterase (deacetylase)	803	CE7|GH5
			2021681113		transcriptional regulator, AraC family	291
	Buffalo rumen fosmid pLC2
				ADB80096.1	RagB/SusD protein	596
				ADB80097.1	hypothetical protein	433
				ADB80098.1	putative polygalacturonase	799
				ADB80099.1	beta-mannanase	469	GH26
				ADB80100.1	endoglucanase	532	GH5		BACON
				ADB80101.1	beta-mannanase	368	GH26
				ADB80102.1	glycosidase	386	GH43
				ADB80103.1	putative cation symporter	446
				ADB80104.1	sialic acid-specific 9-O-acetylesterase	483	CE6
	Reindeer rumen SRM-1 Sc00010
			2204903375		Cellobiose phosphorylase	800	GH94
			2204903376		Na+/melibiose symporter and related transporters	360
			2204903377		Na+/melibiose symporter and related transporters	278
			2204903378		Predicted glycosylase	388	GH43
			2204903379		Beta-mannanase( EC:3.2.1.78 )	362	GH26
			2204903380		Endoglucanase	532	GH5		BACON
			2204903381		Endoglucanase	508	GH5
			2204903382		hypothetical protein	629
			2204903383		SusD family.	558
			2204903384		TonB-linked outer membrane protein, SusC/RagA family	926
			2204903385		hypothetical protein	92
			2204903386		SusD family.	226
			2204903387		hypothetical protein	322
			2204903388		TonB-linked outer membrane protein, SusC/RagA family	1053
			2204903389		Acetyl esterase (deacetylase)	540	CE7|GH5
	Cow rumen uncultured phylotype AC2a
			2527869_58650		Gene expression regulation	285
			2527869_58640		Cellobiose phosphorylase	817	GH94
			2527869_58630		Cellulase	415	GH5	TW-33 (ADX05734)
			2527869_58620		SusC-like	1050
			2527869_58610		SusD-like	560
			2527869_58600		SusF-like	410
			2527869_58590		Sugar transport protein	447
			2527869_58580		Cellulase	593	GH9	TW-64 (ADX05733)
	Yak rumen Contig217-00001
		Contig217-00001-1			beta-glucosidase	193	GH3
		Contig217-00001-2			alpha-glycosidase		GH31
		Contig217-00001-3			sialic acid acetylesterase
		Contig217-00001-4			Putative β-mannanase	366	GH26
		Contig217-00001-5	HQ634710.1		Cellulase/endoglucanase	506	GH5		BACON
		Contig217-00001-6			β-mannanase	396	GH26
		Contig217-00001-7			putative polygalacturonase
		Contig217-00001-8			putative lipoprotein
		Contig217-00001-9			SusD (outer membrane protein)
		Contig217-00001-10			TonB dependent receptor
	Yak rumen contig310-00038
		contig310-00038-15			GPH: cation symporter sugar transport
		contig310-00038-16			Predicted glycosylase		GH43
		contig310-00038-17			β-mannanase	360	GH26
		contig310-00038-18	HQ634712.1		cellulase	428	GH5
		contig310-00038-19	HQ634706.1		cellulase	526	GH5		BACON
		contig310-00038-20			Manna endo-1,4-beta mannosidase	471	GH26
		contig310-00038-21			putative polygalacturonase
		contig310-00038-22			hypothetical protein
		contig310-00038-23			SusD (outer membrane protein)
		contig310-00038-24			TonB dependent receptor
	Contig1529-PUL17, this study		KC246798
		gene_id_921			glycoside hydrolase family 42	586	GH35
		gene_id_922			WD40 domain-containing protein	443	PL22
		gene_id_923			glycosyl hydrolase, family 88	462	GH105
		gene_id_924			hypothetical protein	636
		gene_id_925			beta-glucosidase	745	GH3
		gene_id_926			cellulase	524	GH5
		gene_id_927			putative polygalacturonase	573
		gene_id_928			RagB/SusD domain protein	572
		gene_id_929			TonB-dependent receptor plug domain protein	932
		gene_id_930			SusD family protein	663
		gene_id_931			TonB-dependent receptor plug domain protein	198
	Contig196-PUL19, this study		KC246824
		gene_id_1565			mannan endo-1,4-beta-mannosidase	429	GH5
		gene_id_1566			cellulase	523	GH5
		gene_id_1567			bifunctional mannanase-xyloglucanase	437	GH26
		gene_id_1568			putative polygalacturonase	619
		gene_id_1569			hypothetical protein	419
		gene_id_1570			RagB/SusD domain-containing protein	580
		gene_id_1571			TonB-dependent receptor, plug	550
	* For Tammar Wallaby, reindeer and cow rumen, data were either downloaded from IMG database under each project or cited from paper [3, 5]. For Buffalo rumen fosmids, data were downloaded from Genbank (www.ncbi.nlm.nih.gov). For yak rumen, only four sequence information were available in Genbank at present and the rest information were cited from reference [7]. For this study, the Genbank accessio…
